# Supplementary material for: A Decrease in Branched-Chain Amino Acids after a Competitive Male Professional Volleyball Game—A Metabolomic-Based Approach
Source: MDPI journal article supplement (doi:10.3390/metabo14020115), 2024-02-09
Supplement: s1 [file s1]

## Article

# A Decrease in Branched-Chain Amino Acids after a Competitive Male Professional Volleyball Game—A Metabolomic-Based Approach

Taillan Martins Oliveira <sup>1</sup>, Tathiany Jéssica Ferreira <sup>1</sup>, Paula Albuquerque Penna Franca <sup>1</sup>, Rudson Ribeiro da Cruz <sup>1</sup>, Mauricio Gattás Bara-Filho <sup>2</sup>, Fábio Luiz Candido Cahuê <sup>1</sup>, Ana Paula Valente <sup>3</sup> and Anna Paola Trindade Rocha Pierucci <sup>1,\*</sup>

**Supplementary Table S1.** Serum concentrations of biochemical markers analyzed in the study of professional volleyball athletes ( $n=13$ ).

| Variables                | Before                  | After                   | p-value |
|--------------------------|-------------------------|-------------------------|---------|
|                          | Mean $\pm$ SD           | Mean $\pm$ SD           |         |
| AST(U/l)                 | 21.27 $\pm$ 14.27       | 21.36 $\pm$ 15.69       | 0.468   |
| ALT(U/l)                 | 16.48 $\pm$ 7.17        | 17.96 $\pm$ 6.10        | 0.071   |
| Glucose (mg/dl)          | 76.62 $\pm$ 24.81       | 88.73 $\pm$ 26.31       | 0.669   |
| CK (U/l)                 | 339.46 $\pm$ 227.35     | 310.22 $\pm$ 233.26     | 0.426   |
| Lactate (mmol/l)         | 12,685.76 $\pm$ 4920.20 | 11,327.83 $\pm$ 5883.91 | 0.355   |
| Uric Acid                | 3.39 $\pm$ 1.11         | 3.32 $\pm$ 1.57         | 0.707   |
| Triglycerides (mg/dl)    | 52.15 $\pm$ 26.99       | 41.43 $\pm$ 21.10       | 0.521   |
| LDL (mg/dl)              | 70.72 $\pm$ 33.71       | 73.17 $\pm$ 23.97       | 0.533   |
| HDL (mg/dl)              | 41.47 $\pm$ 15.07       | 44.70 $\pm$ 13.90       | 0.630   |
| Cholesterol (mg/dl)      | 124.06 $\pm$ 58.46      | 131.74 $\pm$ 59.37      | 0.893   |
| Hydroxybutyrate (mmol/l) | 0.12 $\pm$ 0.10         | 0.1 $\pm$ 0.07          | 0.902   |
| CAT (mmol/l)             | 1.96 $\pm$ 0.29         | 2.12 $\pm$ 0.32         | 0.951   |

Total Antioxidant Capacity (CAT), low density lipoprotein (LDL), high density lipoprotein (HDL), standard deviation (SD), international units (IU), liter (l), milligram (mg), deciliter (dl), millimole (mmol). Data are presented as mean  $\pm$  standard deviation.
